# Supplementary material for: Predictors of E-Cigarette Use Susceptibility—A Study of Young People from a Socio-Economically Disadvantaged Rural Area in Poland
Source: Int J Environ Res Public Health. 2019 Oct 16;16(20):3935. doi: 10.3390/ijerph16203935 (PMC6843563; doi:10.3390/ijerph16203935)
Supplement: Supplementary file 1 [file ijerph-16-03935-s001.pdf]

**Table S1.** Factors associated with susceptibility to e-cigarette use among the secondary and high school students from Piotrkowski district—analysis for never and ever e-cigarette users.

| Characteristic | Characteristics of Never and Ever<br>E-Cigarette Users <i>n</i> = 1693 | Proportion of Susceptible to E-Cigarette<br>Use <i>n</i> = 1208 (71.4%) | Crude    |           | Adjusted |            |
|----------------|------------------------------------------------------------------------|-------------------------------------------------------------------------|----------|-----------|----------|------------|
|                | <i>n</i> (%)                                                           | <i>n</i> (%)                                                            | OR       | 95 % CI   | OR       | 95 % CI    |
|                |                                                                        | Gender                                                                  |          |           |          |            |
| Male           | 938 (55.4)                                                             | 666 (71.0)                                                              | 0.96     | 0.78–1.19 |          |            |
| Female         | 755 (44.6)                                                             | 542 (71.8)                                                              | Ref.     |           |          |            |
|                |                                                                        | Age (in years)                                                          |          |           |          |            |
| ≤15            | 1183 (70.2)                                                            | 949 (80.2)                                                              | 3.37 *** | 2.60–4.38 |          |            |
| 16–17          | 176 (10.4)                                                             | 76 (43.2)                                                               | 0.63 **  | 0.43–0.91 |          |            |
| ≥18            | 326 (19.3)                                                             | 178 (54.6)                                                              | ref.     |           |          |            |
|                |                                                                        | School grade                                                            |          |           |          |            |
| Secondary      | 1183 (69.9)                                                            | 949 (80.2)                                                              | 3.93 *** | 3.14–4.92 | 6.2 5*** | 4.17–10.00 |
| High           | 510 (30.1)                                                             | 259 (50.8)                                                              | Ref.     |           | Ref.     |            |
|                |                                                                        | Mother's education                                                      |          |           |          |            |
| Low            | 760 (45.7)                                                             | 490 (64.5)                                                              | Ref.     |           | Ref.     |            |
| Medium         | 500 (30.1)                                                             | 366 (73.2)                                                              | 1.51 *** | 1.17–1.93 | 3.97 *** | 2.55–6.18  |
| High           | 403 (24.2)                                                             | 335 (83.1)                                                              | 2.71 *** | 2.01–3.67 | 3.96 *** | 2.16–7.27  |
|                |                                                                        | Father's education                                                      |          |           |          |            |
| Low            | 840 (50.4)                                                             | 610 (72.6)                                                              | Ref.     |           | Ref.     |            |
| Medium         | 496 (29.8)                                                             | 308 (62.1)                                                              | 0.62 *** | 0.49–0.72 | 0.86     | 0.57–1.29  |
| High           | 330 (19.8)                                                             | 276 (83.6)                                                              | 1.93 *** | 1.39–2.68 | 1.70     | 0.87–3.33  |
|                |                                                                        | Money available per month                                               |          |           |          |            |
| <100 PLN       | 1003 (60.6)                                                            | 749 (74.7)                                                              | Ref.     |           | Ref.     |            |
| ≥100 PLN       | 653 (39.4)                                                             | 437 (66.9)                                                              | 0.69 *** | 0.55–0.85 | 0.47 *** | 0.31–0.69  |
|                |                                                                        | Parental smoking                                                        |          |           |          |            |
| None           | 844 (50.2)                                                             | 565 (66.9)                                                              | Ref.     |           | Ref.     |            |
| One or both    | 838 (49.8)                                                             | 636 (75.9)                                                              | 1.55 *** | 1.26–1.93 | 2.35 *** | 1.63–3.38  |
|                |                                                                        | Parental e-cigarettes use                                               |          |           |          |            |
| None           | 1119 (67.5)                                                            | 776 (69.3)                                                              | Ref.     |           | Ref.     |            |
| One or both    | 538 (32.5)                                                             | 408 (75.8)                                                              | 1.39 **  | 1.10–1.75 | 1.09     | 0.66–1.42  |
|                |                                                                        | Friends' smoking                                                        |          |           |          |            |

|                                                            |             |             |           |            |           |            |
|------------------------------------------------------------|-------------|-------------|-----------|------------|-----------|------------|
| None                                                       | 366 (21.6)  | 210 (57.4)  | Ref.      |            | Ref.      |            |
| Some                                                       | 1327 (78.4) | 998 (75.2)  | 2.25 ***  | 1.77–2.87  | 1.88 **   | 1.22–2.89  |
| Friends' e-cigarette use                                   |             |             |           |            |           |            |
| None                                                       | 94 (7.3)    | 58 (61.7)   | Ref.      |            | Ref.      |            |
| Some                                                       | 1188 (92.7) | 879 (74.0)  | 1.77 **   | 1.14–2.73  | 1.33      | 0.70–2.52  |
| Ban on smoking at home                                     |             |             |           |            |           |            |
| Yes                                                        | 693 (41.0)  | 484 (69.8)  | Ref.      |            |           |            |
| No                                                         | 997 (59.0)  | 724 (72.6)  | 1.15      | 0.92–1.42  |           |            |
| Ban on smoking at school                                   |             |             |           |            |           |            |
| Yes                                                        | 1071 (63.5) | 770 (71.9)  | Ref.      |            |           |            |
| No                                                         | 616 (36.5)  | 436 (70.8)  | 0.95      | 0.76–1.18  |           |            |
| Ban on e-cigarettes use at school                          |             |             |           |            |           |            |
| Yes                                                        | 698 (41.4)  | 466 (66.8)  | Ref.      |            | Ref.      |            |
| No                                                         | 988 (58.6)  | 738 (74.7)  | 1.47 ***  | 1.19–1.82  | 1.04      | 0.68–1.46  |
| Alcohol consumption                                        |             |             |           |            |           |            |
| Non-drinker                                                | 498 (29.5)  | 265 (53.2)  | Ref.      |            | Ref.      |            |
| Moderate                                                   | 409 (24.2)  | 321 (78.5)  | 3.21 ***  | 2.39–4.31  | 3.29 ***  | 2.07–5.25  |
| Binge                                                      | 781 (46.3)  | 620 (79.4)  | 3.39 ***  | 2.64–4.34  | 1.88 **   | 1.27–2.80  |
| Tobacco-smoking                                            |             |             |           |            |           |            |
| Never smokers                                              | 682 (40.3)  | 376 (55.1)  | Ref.      |            | Ref.      |            |
| Former smokers                                             | 549 (32.4)  | 400 (72.9)  | 2.18 ***  | 1.72–2.78  | 2.17 ***  | 1.49–3.15  |
| Current smokers                                            | 462 (27.3)  | 432 (93.5)  | 11.72 *** | 7.85–17.50 | 13.17 *** | 9.79–24.56 |
| Girls who use e-cigarettes are:                            |             |             |           |            |           |            |
| More attractive                                            | 594 (35.1)  | 537 (90.4)  | 6.01 ***  | 4.45–8.11  | 3.23 ***  | 2.03–5.15  |
| Less attractive or no difference                           | 1099 (64.9) | 671 (61.1)  | Ref.      |            | Ref.      |            |
| Boys who use e-cigarettes are:                             |             |             |           |            |           |            |
| More attractive                                            | 663 (39.4)  | 526 (79.3)  | 1.93 ***  | 1.53–2.42  | 1.38      | 0.94–2.04  |
| Less attractive or no difference                           | 1021 (60.6) | 680 (66.6)  | Ref.      |            | Ref.      |            |
| Perception that smoking is harmful to health               |             |             |           |            |           |            |
| Yes                                                        | 1481 (87.7) | 1049 (70.8) | Ref.      |            |           |            |
| No                                                         | 208 (12.3)  | 155 (74.5)  | 1.20      | 0.86–1.68  |           |            |
| Relative harmfulness (comparing to traditional cigarettes) |             |             |           |            |           |            |
| As harmful                                                 | 712 (42.4)  | 486 (68.3)  | Ref.      |            | Ref.      |            |
| Less harmful                                               | 826 (49.2)  | 628 (76.0)  | 1.47 ***  | 1.18–1.85  | 1.50 *    | 1.05–2.15  |
| More harmful                                               | 141 (8.4)   | 90 (63.8)   | 0.82      | 0.56–1.20  | 0.89      | 0.64–2.21  |

|       |             | Use of e-cigarettes |          |           |      |           |
|-------|-------------|---------------------|----------|-----------|------|-----------|
| Never | 1054 (62.3) | 713 (67.6)          | Ref.     |           | Ref. |           |
| Ever  | 639 (37.7)  | 495 (77.5)          | 1.64 *** | 1.31–2.06 | 1.30 | 0.91–1.84 |

\*  $p < 0.05$ ; \*\*  $p < 0.01$ ; \*\*\*  $p < 0.001$ . # age was not included in multivariate model as this variable was highly correlated with school grade.
